# Supplementary material for: Surface amorphization and functionalization of a NiFeOOH electrocatalyst for a robust seawater electrolyzer
Source: Royal Society of Chemistry journal article supplement (doi:10.1039/d4ey00106k), 2024-01-01
Supplement: d4ey00106k1.pdf [file d4ey00106k1.pdf]

# Electronic Supplementary Information

## **Surface amorphization and functionalization of NiFeOOH electrocatalyst for robust seawater electrolyzer**

*Hao Wang,<sup>a,c</sup> Nannan Jiang,<sup>a</sup> Bing Huang,<sup>a</sup> Qiangmin Yu<sup>\*b</sup> and Lunhui Guan<sup>\*a</sup>*

<sup>a</sup> State Key Laboratory of Structural Chemistry, Fujian Key Laboratory of Nanomaterials, and CAS Key Laboratory of Design and Assembly of Functional Nanostructures, Fujian Institute of Research on the Structure of Matter, Chinese Academy of Sciences, Fuzhou, Fujian 350002, China.

<sup>b</sup> Shenzhen Geim Graphene Center, Tsinghua-Berkeley Shenzhen Institute & Institute of Materials Research, Tsinghua Shenzhen International Graduate School, Tsinghua University, Shenzhen 518055, P.R. China.

<sup>c</sup> College of Chemistry, Fuzhou University, Fuzhou 350108, China.

Corresponding authors

Qiangmin Yu, e-mail: [yu.qiangmin@sz.tsinghua.edu.cn](mailto:yu.qiangmin@sz.tsinghua.edu.cn)

Lunhui Guan, e-mail: [guanlh@fjirsm.ac.cn](mailto:guanlh@fjirsm.ac.cn)

## Experimental Section

### Synthesis of NiFe LDH precursor

First, 3 mmol of  $\text{Ni}(\text{NO}_3)_2 \cdot 6\text{H}_2\text{O}$  and 1 mmol of  $\text{Fe}(\text{NO}_3)_3 \cdot 9\text{H}_2\text{O}$  were dissolved in 40 mL of deionized water, 4 mmol of urea and 8 mmol of  $\text{NH}_4\text{F}$  were dissolved in 10 mL of deionized water, then the latter was added dropwise to the former. The solution was then transferred to a round-bottomed flask in an oil bath at 150 °C for 6 h. After the reaction, the samples were washed with anhydrous ethanol and deionised water, then dried by freeze dryer.

### Synthesis of $\text{Ru}_{0.1}$ -NiFe LDH

30 mg of NiFe LDH was dispersed in a mixed solvent of anhydrous ethanol and deionised water (the volume ratio of anhydrous ethanol to water was 2:1), and sonicated for 30 min, subsequently. The above solution was pre-stirred for 30 min. Then, the  $\text{RuCl}_3 \cdot 3\text{H}_2\text{O}$  (10 wt%) anhydrous ethanol solution was added dropwise to the above solution and stirred for 3 h. The solution was then filtered and washed with isopropanol. The samples were dried in a freeze dryer. The synthesis process of  $\text{Ru}_{0.01}$ -NiFe LDH and  $\text{Ru}_{0.15}$ -NiFe LDH is the same with the  $\text{Ru}_{0.1}$ -NiFe LDH, with the only difference being the amount of  $\text{RuCl}_3 \cdot 3\text{H}_2\text{O}$  used, at 1 wt% and 15 wt%, respectively.

### Synthesis of $\text{Ru}_{0.1}$ -NiFeP

0.4 g of sodium hypophosphite and 30 mg  $\text{Ru}_{0.1}$ -NiFe LDH were placed in a glass-porcelain boat, respectively, the former in the upstream of the tube furnace and the latter in the downstream. Subsequently, they were annealed at 400 °C (2 °C/min) for 2 h. The synthesis of NiFeP is the same with  $\text{Ru}_{0.1}$ -NiFeP just without Ru doping process. The synthesis process of  $\text{Ru}_{0.01}$ -NiFeP and  $\text{Ru}_{0.15}$ -NiFeP is the same with the  $\text{Ru}_{0.1}$ -NiFeP.

### Preparation of $\text{Ru}_{0.1}$ -NiFeOOH/ $\text{PO}_4^{3-}$

Pre-treatment of the working electrode substrate: First, a piece of nickel foam measuring  $1 \times 1 \text{ cm}^2$  is cut. Then, the nickel foam is ultrasonically cleaned in acetone, 1 M HCl, and

deionized water for 15 min each, respectively, to remove any grease and oxidized nickel from the surface of the nickel foam.

Catalyst ink preparation: 5 mg of Ru<sub>0.1</sub>-NiFeP is dispersed in a mixed solvent of 970  $\mu$ L isopropanol and 30  $\mu$ L anionic polymer, and sonicated for 2 h to obtain the Ru<sub>0.1</sub>-NiFeP catalyst ink.

The preparation of Ru<sub>0.1</sub>-NiFeOOH/PO<sub>4</sub><sup>3-</sup> is achieved through the activation of Ru<sub>0.1</sub>-NiFeP via cyclic voltammetry. First, the Ru<sub>0.1</sub>-NiFeP catalyst ink is applied onto pre-treated nickel foam using a pipette, and the loading amount of the Ru<sub>0.1</sub>-NiFeP catalyst is controlled to be 1 mg cm<sup>-2</sup>. Then, a three-electrode system is utilized, and the activation is carried out for 300 cycles, within the potential range of 0.135-0.235 V vs Ag/AgCl, at a scan rate of 0.1 V s<sup>-1</sup> vs Ag/AgCl. The preparation method for NiFeOOH/PO<sub>4</sub><sup>3-</sup> and Ru<sub>0.1</sub>-NiFeOOH is the same, except that Ru<sub>0.1</sub>-NiFeP is replaced with NiFeP and Ru<sub>0.1</sub>-NiFe LDH respectively.

### **Physical characterization**

The structures of samples were first examined by SEM (ZEISS GeminiSEM 300) and TEM (FEI Talos 200S) coupled with energy dispersive X-ray spectroscopy (EDS). The phase information of the electrodes was investigated through X-ray diffraction (XRD) pattern from a MiniFlex 600 with a Cu K $\alpha$  radiation source. The surface chemical information was measured via X-ray photoelectron spectroscopy (XPS) using an Thermo Scientific K-Alpha system. All measured XPS spectra were calibrated by the C 1s peak (284.8 eV for adventitious hydrocarbon). X-ray absorption structure (XAS) spectra at the Ru K-edges were recorded at the Shanghai Synchrotron Radiation Facility (SSRF). The atomic images of Ru were obtained using a spherical aberration-corrected scanning transmission electron microscope (JEM-ARM300F). Raman spectrum of the electrodes were collected on HORIBA labRAM spectrometer with a 532 nm laser. The elemental composition was determined by ICP-OES (Agilent 5800).

### **Electrochemical measurements**

The electrochemical tests were performed at room temperature on an electrochemical

workstation (CHI 760e). The electrochemical performance was conducted in a standard three-electrode system with different alkaline electrolytes (1 M KOH (PH = 13.8), 1 M KOH + 0.5 M NaCl (PH = 13.8), 1 M KOH + seawater (PH = 13.74), 6 M KOH + seawater (PH = 14.73), detected by PH meter), for which Ag/AgCl/salt bridge and Pt electrodes were used as the reference and counter electrodes, respectively. The catalytic activity including OER and overall water/seawater splitting was collected by reverse linear sweep voltammetry (LSV) curves at a scan rate of 5 mV s<sup>-1</sup> with 90% IR-correction. The CV curves with scan rates of 20-100 mV s<sup>-1</sup> were recorded to calculate double-layer capacitance. Electrochemical impedance spectroscopy (EIS) was measured from 100 kHz to 0.01 Hz. All potentials were converted to reversible hydrogen electrode (RHE) through the Nernst equation ( $E_{\text{RHE}} = E_{\text{Ag/AgCl}} + 0.059\text{pH} + 0.197$ ).

**Stability measurement:** Long-term stability test was carried out in a two-electrode system. Platinum sheet was used as cathode and nickel foam (1×1 cm<sup>2</sup>) as anode and the anode loading was 1 mg/cm<sup>2</sup>.

**Seawater collection:** The collection of seawater was done at Xiasha beach, Fujian Province, China. (119°36' E, 25°47' N)

### **Analysis of Hypochlorite by Titration Method**

In the analysis of reactive chlorine species, iodide titration was employed. The process began by adjusting the pH of 10 ml of electrolyte to between 1 and 2 using 0.5 M H<sub>2</sub>SO<sub>4</sub>. Subsequently, 5 mL of 0.5 M KI solution was dropped into the mixture while stirring magnetically. Following this, a 0.01 M thiosulfate solution was gradually added. Notably, a yellow coloration emerges in the electrolyte post-thiosulfate addition, indicating the formation of chlorine species.

### **AEMWE measurement**

Ru<sub>0.1</sub>-NiFeOOH/PO<sub>4</sub><sup>3-</sup> catalyst sprayed on Ni fiber and carbon paper as both anode and cathode (2 cm<sup>2</sup>) to assemble anion exchange membrane (AEM) water electrolyzer. An anion

exchange membrane (Sustainion® X37-50-grade T, America) was utilized to separate the cathode and anode. The catalytic performance AEM electrolyzer was measured by a power supply (Interface 5000E, Gamry), While the electrolyte was pumped into electrolyzer with 60 mL min<sup>-1</sup>. The chronopotentiometry curve of the Ru<sub>0.1</sub>-NiFeOOH/PO<sub>4</sub><sup>3-</sup> AEM electrolyzer was obtained by recording an average cell voltage at 0.5 A cm<sup>-2</sup> every 5 s.

### DFT calculations

All the DFT computations were carried out using the Vienna ab initio simulation package (VASP). The exchange-correlation energy was evaluated using generalized gradient approximation (GGA) with the Perdew–Burke–Ernzerhof (PBE) functional, and the projector augmented wave (PAW) method was used to describe the electron-ion interactions. The energy cutoff for plane wave expansions was set to 450 eV, and the convergence threshold was set as 10<sup>-5</sup> eV in energy and 0.02 eV Å<sup>-1</sup> in force, respectively. For the calculations on the slab models, a vacuum space of 15 Å was added to avoid the interaction between periodic images. In addition, the dipolar correction was adopted for slab models with the symmetrization switching off. K-POINT was set to 2 x 2 x1.

The typical adsorbate evolution mechanism proposed by Nørskov et al. was chosen to evaluate the OER performance for slab models. Briefly, the reaction free energy of each step could be expressed as follows:

$$\Delta G_1 = E(HO^*) - E(^*) - E_{H_2O} + 1/2E_{H_2} + (\Delta ZPE - T\Delta S)_1 - eU \quad [1]$$

$$\Delta G_2 = E(O^*) - E(HO^*) + 1/2E_{H_2} + (\Delta ZPE - T\Delta S)_2 - eU \quad [2]$$

$$\Delta G_3 = E(HOO^*) - E(O^*) - E_{H_2O} + 1/2E_{H_2} + (\Delta ZPE - T\Delta S)_3 - eU \quad [3]$$

$$\Delta G_4 = E(^*) - E(HOO^*) + E_{O_2} + 1/2E_{H_2} + (\Delta ZPE - T\Delta S)_4 - eU \quad [4]$$

where  $E(^*)$ ,  $E(HO^*)$ ,  $E(O^*)$ , and  $E(HOO^*)$  are the total energy of the clean surface and the adsorbed surface with three intermediates, respectively.  $E_{H_2O}$ ,  $E_{H_2}$ , and  $E_{O_2}$  are the computed energies for the H<sub>2</sub>O, H<sub>2</sub>, and O<sub>2</sub> molecules, respectively. The values of  $\Delta ZPE$  were determined

by the computed vibrational frequencies and the  $-eU$  term represents the external bias  $U$  imposed on each step.

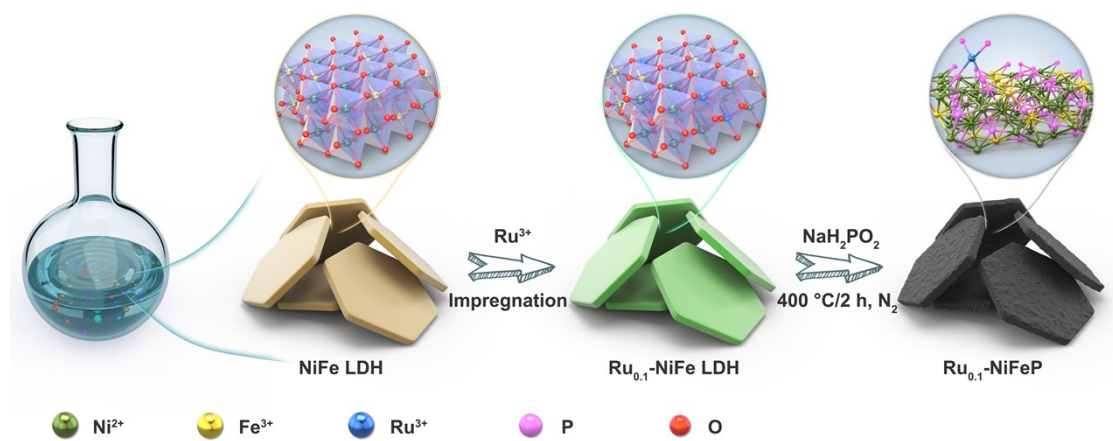

**Figure S1** Schematic of the synthesis of pre-catalyst  $\text{Ru}_{0.1}\text{-NiFeP}$ .

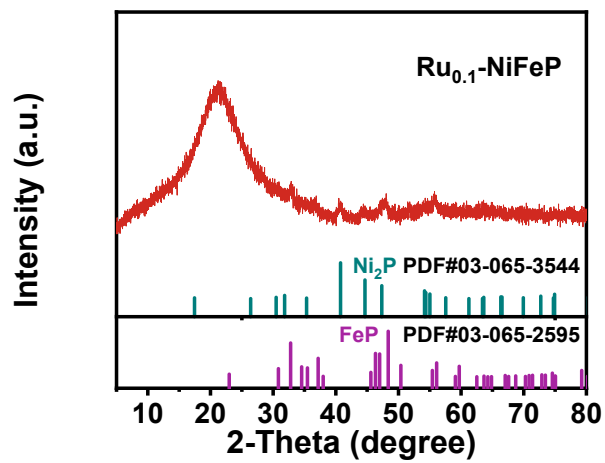

Figure S2 XRD pattern of Ru<sub>0.1</sub>-NiFeP.



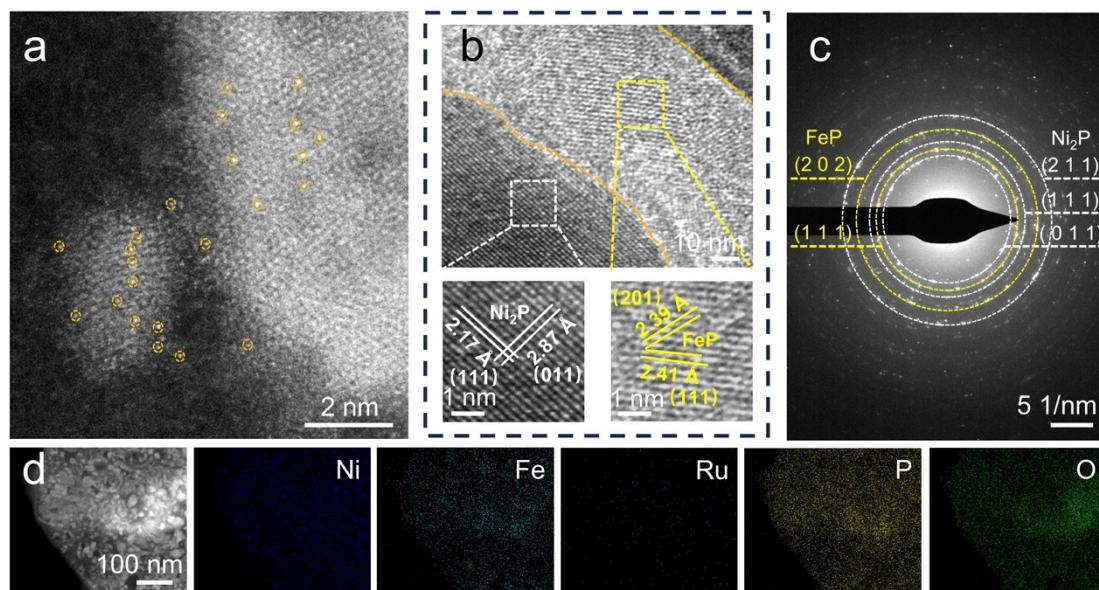

**Figure S3** (a) AC-STEM image of  $\text{Ru}_{0.1}\text{-NiFeP}$ , (b) HRTEM image of  $\text{Ru}_{0.1}\text{-NiFeP}$  and lattice fringes of  $\text{Ni}_2\text{P}$  and  $\text{FeP}$ , (c) SAED pattern of  $\text{Ru}_{0.1}\text{-NiFeP}$ , and (d) HAADF-STEM image and the corresponding elements mapping distribution patterns of  $\text{Ru}_{0.1}\text{-NiFeP}$ .

The compositional information of  $\text{Ru}_{0.1}\text{-NiFeP}$  is shown in Figure S3. Figure S3a presents the AC-STEM image of  $\text{Ru}_{0.1}\text{-NiFeP}$ , where Ru atoms are indicated with yellow markers. It can be observed that in  $\text{Ru}_{0.1}\text{-NiFeP}$ , Ru exists in the form of single atoms. Figure S3b displays the HRTEM image of  $\text{Ru}_{0.1}\text{-NiFeP}$ ; white markers indicate  $\text{Ni}_2\text{P}$  (PDF#03-065-3544), and yellow markers indicate  $\text{FeP}$  (PDF#03-065-2595). The intact lattice structure of  $\text{Ru}_{0.1}\text{-NiFeP}$ , as seen in the image, suggests a high degree of crystallinity. The corresponding SAED pattern (Figure S3c) confirms that  $\text{Ru}_{0.1}\text{-NiFeP}$  has a polycrystalline structure. Furthermore, the corresponding elemental mapping images (Figure S3d) reveal a uniform distribution of elements such as Ni, Fe, and Ru throughout  $\text{Ru}_{0.1}\text{-NiFeP}$ .

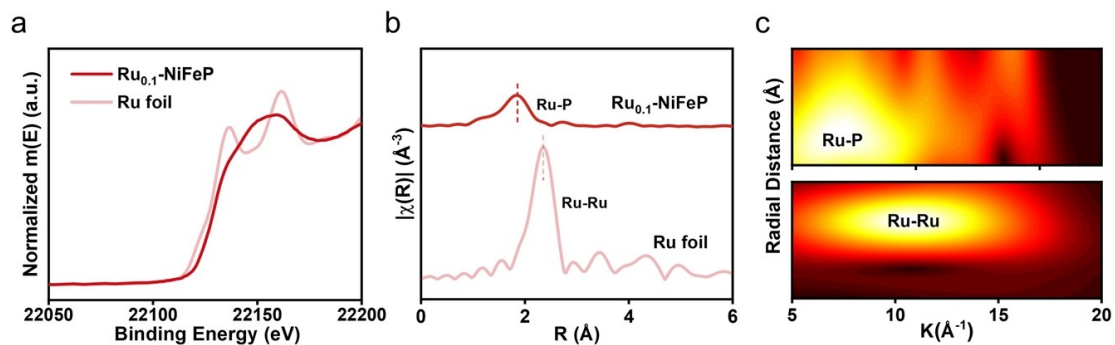

**Figure S4** (a) Ru K-edge of Ru<sub>0.1</sub>-NiFeP and Ru foil, (b)  $k^3$  weight Fourier transform spectra from EXAFS of Ru<sub>0.1</sub>-NiFeP and Ru foil, (c) WT-EXAFS plot for Ru<sub>0.1</sub>-NiFeP and Ru foil.

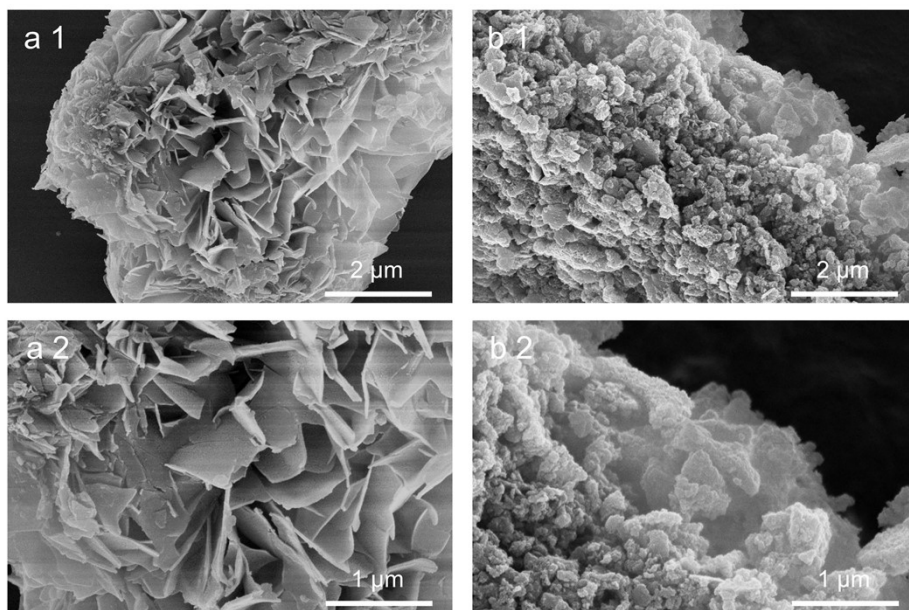

**Figure S5** SEM images of (a1-a2) Ru<sub>0.1</sub>-NiFe LDH and (b1-b2) Ru<sub>0.1</sub>-NiFeOOH/PO<sub>4</sub><sup>3-</sup>.

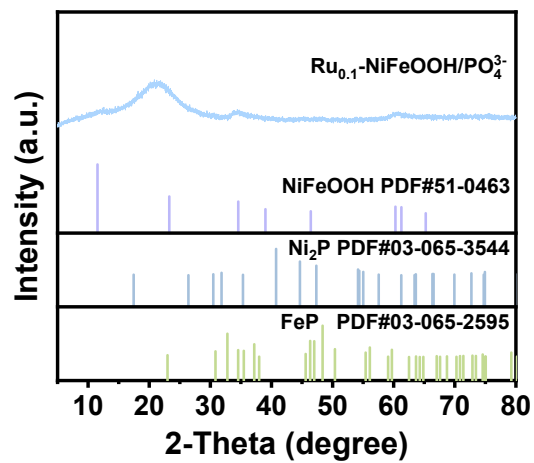

**Figure S6** XRD pattern of  $\text{Ru}_{0.1}\text{-NiFeOOH/PO}_4^{3-}$ .

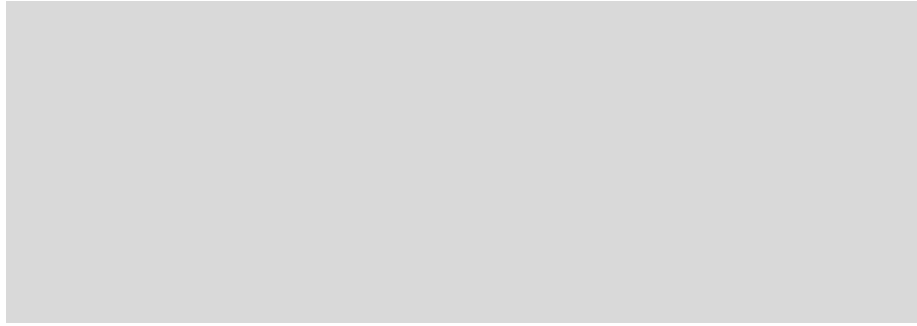

**Figure S7** (a) HR-TEM and (b) SAED images of Ru<sub>0.1</sub>-NiFe LDH.

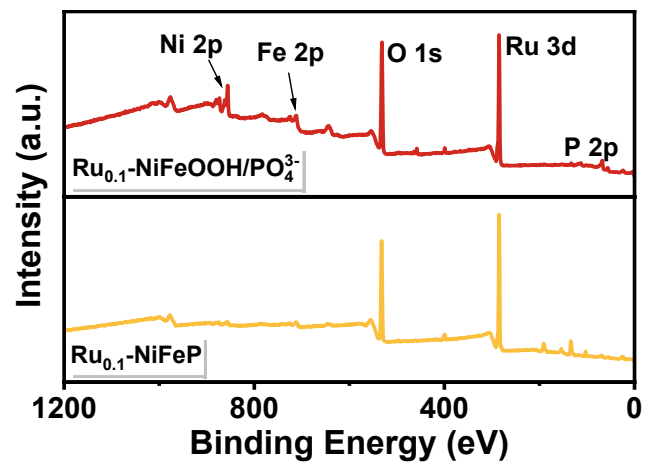

**Figure S8** XPS survey of the Ru<sub>0.1</sub>-NiFeOOH/PO<sub>4</sub><sup>3-</sup> and Ru<sub>0.1</sub>-NiFeP electrocatalysts.

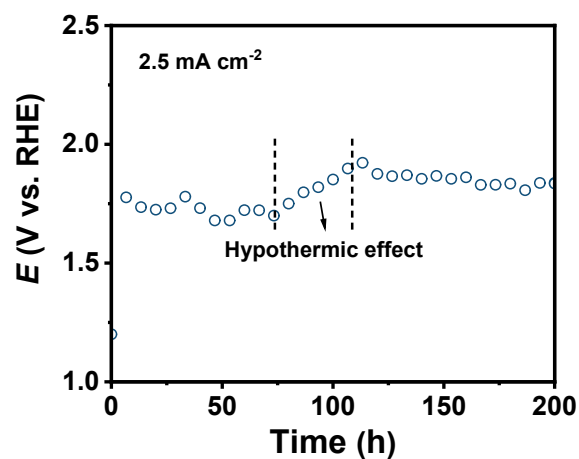

**Figure S9** E-T curve for the activation of  $\text{Ru}_{0.1}\text{-NiFeOOH/PO}_4^{3-}$ .

To study the surface information of  $\text{Ru}_{0.1}\text{-NiFeOOH/PO}_4^{3-}$ , we applied a certain amount of isopropanol ink (binder-free) of  $\text{Ru}_{0.1}\text{-NiFeP}$  onto Ti fiber and activated the  $\text{Ru}_{0.1}\text{-NiFeP}$  using chronoamperometry test.

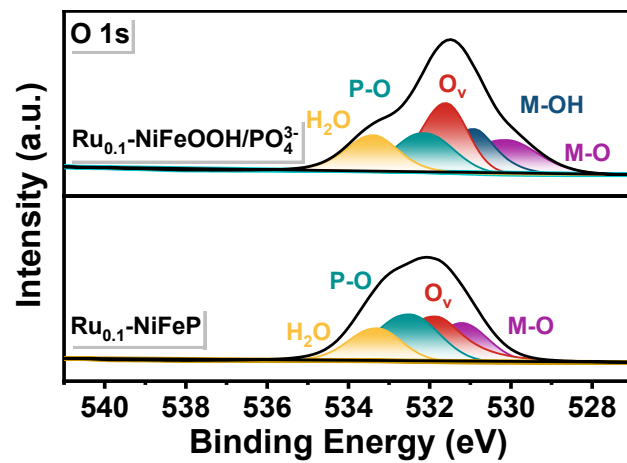

**Figure S10** The high-resolution O 1s XPS spectra of  $\text{Ru}_{0.1}\text{-NiFeOOH/PO}_4^{3-}$  and  $\text{Ru}_{0.1}\text{-NiFeP}$ .



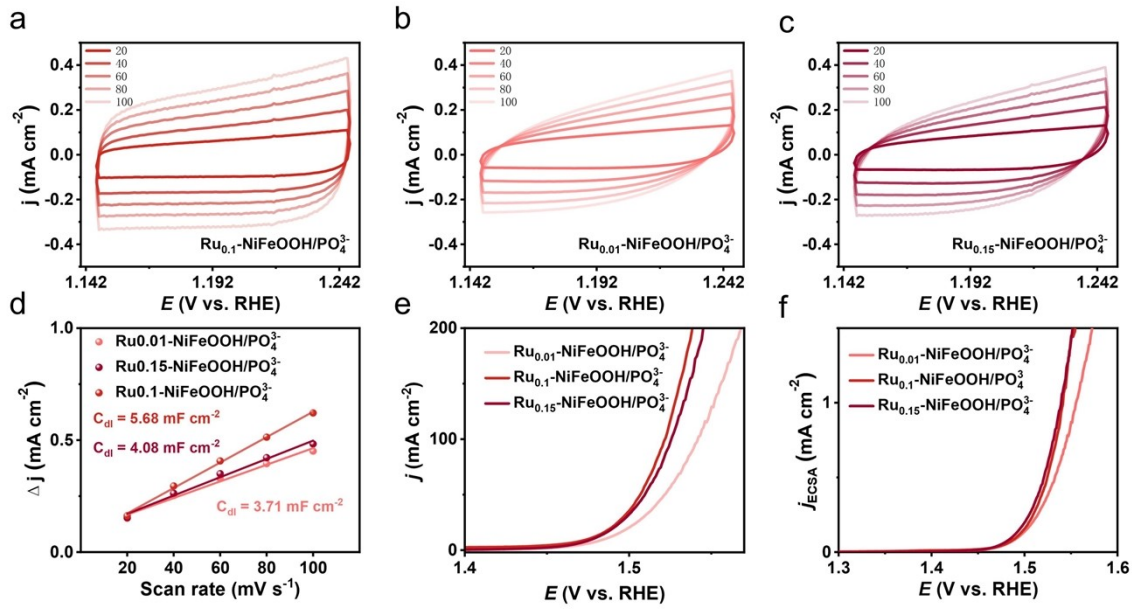

**Figure S11** (a-c) CV curves of  $\text{Ru}_{0.1}\text{-NiFeOOH/PO}_4^{3-}$ ,  $\text{Ru}_{0.01}\text{-NiFeOOH/PO}_4^{3-}$  and  $\text{Ru}_{0.15}\text{-NiFeOOH/PO}_4^{3-}$ . (d) Double-layer capacitance ( $C_{dl}$ ) plots. (e) Polarization curves of samples with different Ru contents. (f) Polarization curves normalized by the corresponding electrochemical active surface area (ECSA) of  $\text{Ru}_{0.1}\text{-NiFeOOH/PO}_4^{3-}$ ,  $\text{Ru}_{0.01}\text{-NiFeOOH/PO}_4^{3-}$  and  $\text{Ru}_{0.15}\text{-NiFeOOH/PO}_4^{3-}$  electrodes. The ECSA of the catalysts was obtained by  $\text{ECSA} = C_{dl}/C_s$ , where specific capacitance  $C_s = 40 \mu\text{F cm}^{-2}$ .<sup>1</sup>

$$\text{ECSA}_{\text{Ru}_{0.1}\text{-NiFeOOH/PO}_4^{3-}} = 5.68 \text{ mF cm}^{-2} / 40 \mu\text{F cm}^{-2} = 142 \text{ cm}^{-2}_{\text{ECSA}}$$

$$\text{ECSA}_{\text{Ru}_{0.01}\text{-NiFeOOH/PO}_4^{3-}} = 3.71 \text{ mF cm}^{-2} / 40 \mu\text{F cm}^{-2} = 92.8 \text{ cm}^{-2}_{\text{ECSA}}$$

$$\text{ECSA}_{\text{Ru}_{0.15}\text{-NiFeOOH/PO}_4^{3-}} = 4.08 \text{ mF cm}^{-2} / 40 \mu\text{F cm}^{-2} = 102 \text{ cm}^{-2}_{\text{ECSA}}$$

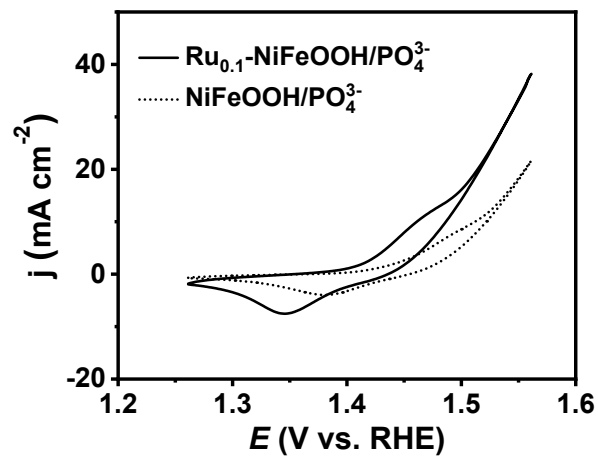

**Figure S12** The CV curves of Ru<sub>0.1</sub>-NiFeOOH/PO<sub>4</sub><sup>3-</sup> and NiFeOOH/PO<sub>4</sub><sup>3-</sup>.

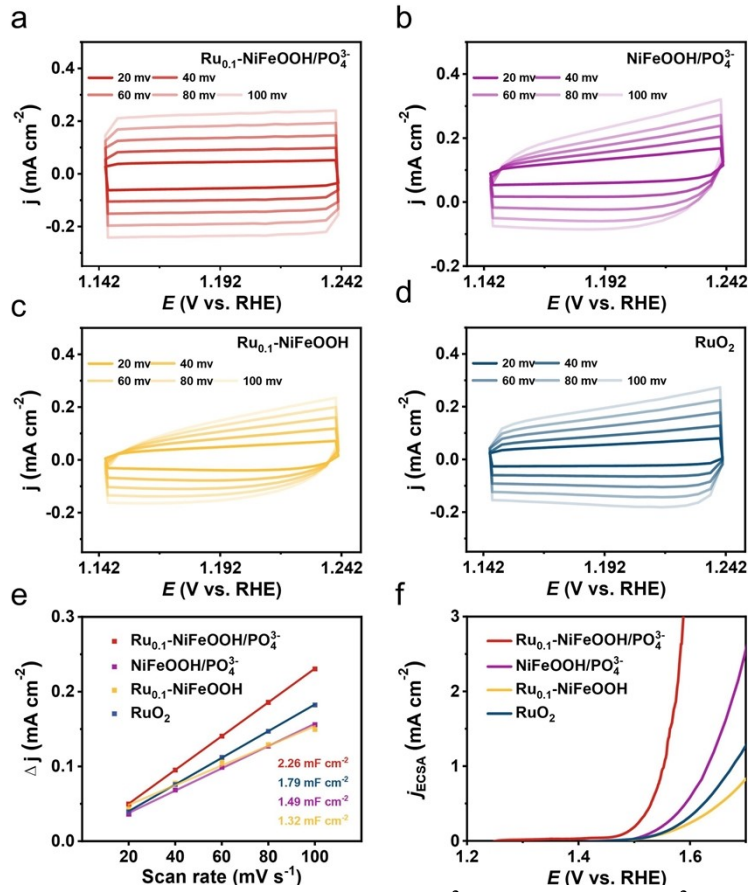

**Figure S13** (a-d) CV curves of  $\text{Ru}_{0.1}\text{-NiFeOOH/PO}_4^{3-}$ ,  $\text{NiFeOOH/PO}_4^{3-}$ ,  $\text{Ru}_{0.1}\text{-NiFeOOH}$ , and  $\text{RuO}_2$ . (e)  $C_{dl}$  plots, and (f) Polarization curves normalized by the corresponding ECSA of  $\text{Ru}_{0.1}\text{-NiFeOOH/PO}_4^{3-}$ ,  $\text{NiFeOOH/PO}_4^{3-}$ ,  $\text{Ru}_{0.1}\text{-NiFeOOH}$ , and  $\text{RuO}_2$  electrodes. The ECSA of the catalysts was obtained by  $\text{ECSA} = C_{dl}/C_s$ , where specific capacitance  $C_s = 40 \mu\text{F cm}^{-2}$ .

$$\text{ECSA}_{\text{Ru}_{0.1}\text{-NiFeOOH/PO}_4^{3-}} = 2.26 \text{ mF cm}^{-2} / 40 \mu\text{F cm}^{-2} = 56.5 \text{ cm}^{-2}_{\text{ECSA}}$$

$$\text{ECSA}_{\text{NiFeOOH/PO}_4^{3-}} = 1.49 \text{ mF cm}^{-2} / 40 \mu\text{F cm}^{-2} = 37.3 \text{ cm}^{-2}_{\text{ECSA}}$$

$$\text{ECSA}_{\text{Ru}_{0.1}\text{-NiFeOOH}} = 1.32 \text{ mF cm}^{-2} / 40 \mu\text{F cm}^{-2} = 33 \text{ cm}^{-2}_{\text{ECSA}}$$

$$\text{ECSA}_{\text{RuO}_2} = 1.79 \text{ mF cm}^{-2} / 40 \mu\text{F cm}^{-2} = 44.8 \text{ cm}^{-2}_{\text{ECSA}}$$

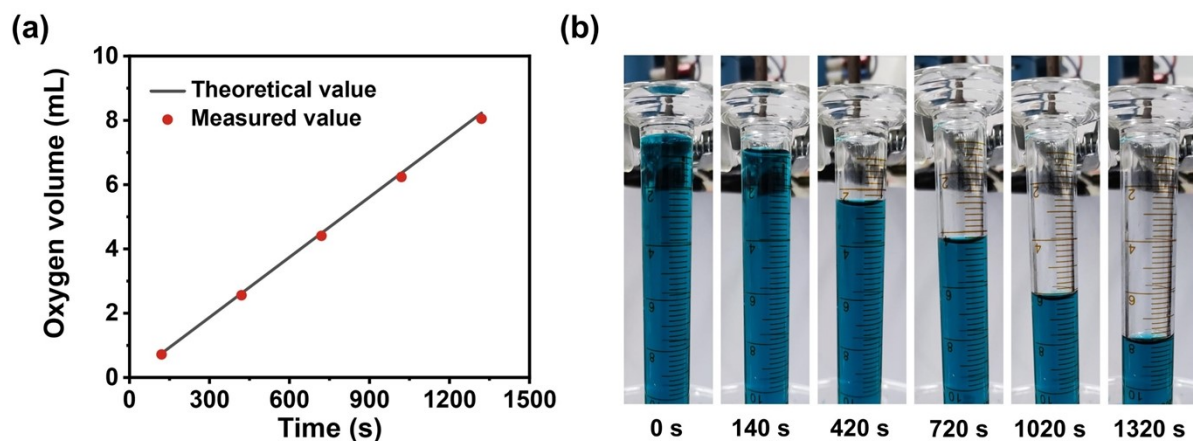

**Figure S14** (a) Experimental and theoretical amounts of  $O_2$  generated by the  $Ru_{0.1}-NiFeOOH/PO_4^{3-}$  electrode. (b) Optical photos of the measuring cylinder that is used to collect the oxygen.

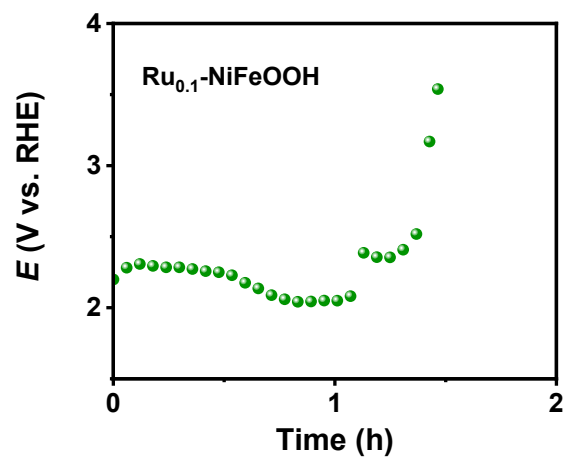

**Figure S15** E-T curve of Ru<sub>0.1</sub>-NiFeOOH in 6 M KOH + seawater at 0.5 A cm<sup>-2</sup>.

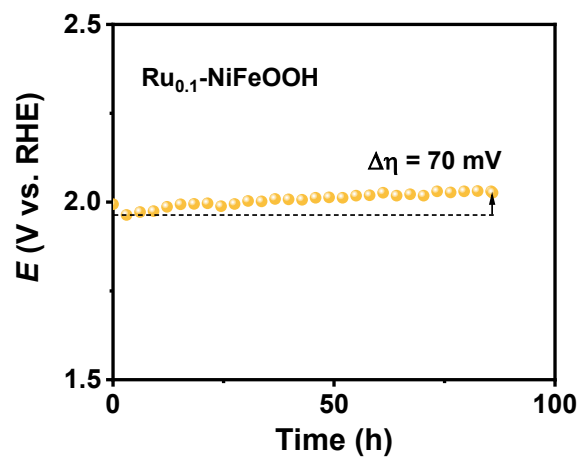

**Figure S16** E-T curve of  $\text{Ru}_{0.1}\text{-NiFeOOH}$  in 1 M KOH + 2 M NaCl electrolyte at  $0.5 \text{ A cm}^{-2}$ .

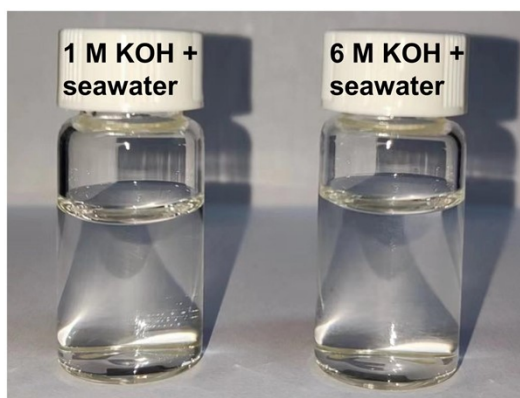

**Figure S17** Optical images of detection results for  $\text{ClO}^-$  in 1 M KOH + seawater and 6 M KOH + seawater after 1,000 h stability test at  $0.5 \text{ A cm}^{-2}$ , respectively.

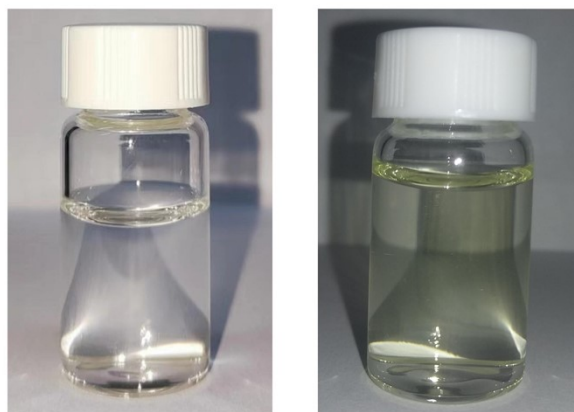

**Ru<sub>0.1</sub>-NiFeOOH/PO<sub>4</sub><sup>3-</sup>**

**Ru<sub>0.1</sub>-NiFeOOH**

**Figure S18** Optical images of detection results for ClO<sup>-</sup> in 1 M KOH + 2 M NaCl after stability test at 0.5 A cm<sup>-2</sup>.



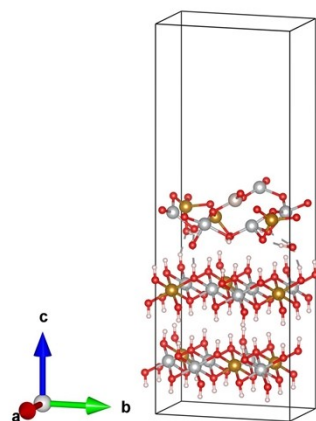

**Figure S19** The main view of the Ru<sub>0.1</sub>-NiFeOOH framework.

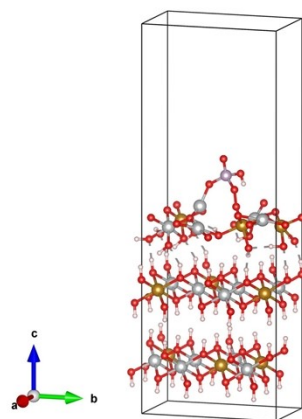

**Figure S20** The main view of the NiFeOOH/PO<sub>4</sub><sup>3-</sup> framework.

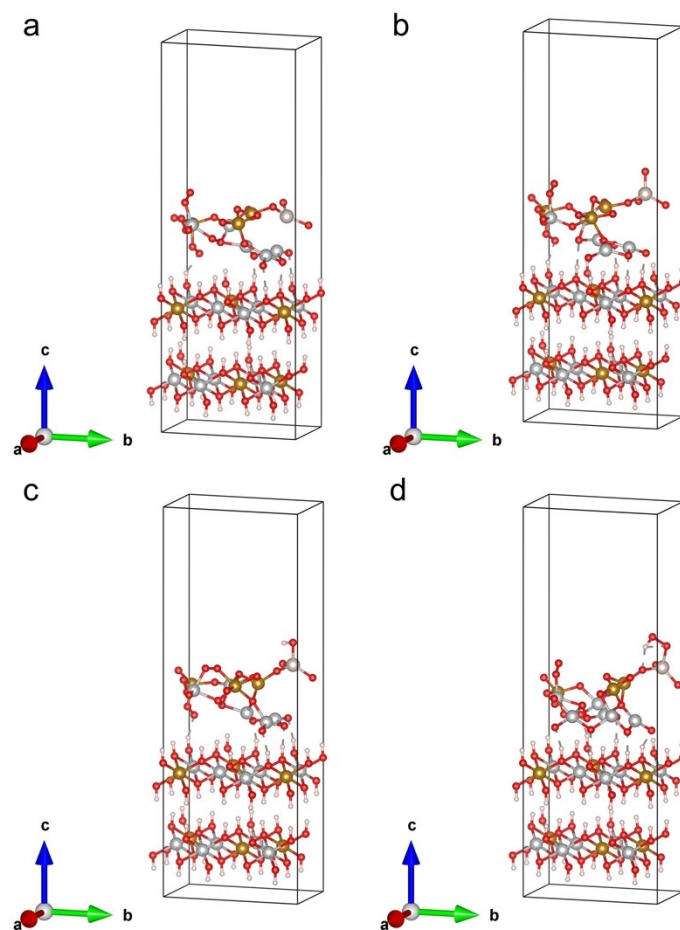

**Figure S21** (a) The main view of the Ru<sub>0.1</sub>-NiFeOOH/PO<sub>4</sub><sup>3-</sup> framework and (b-d) the binding configurations of O\*, OH\*, and OOH\* bonds on Ru<sub>0.1</sub>-NiFeOOH/PO<sub>4</sub><sup>3-</sup>.

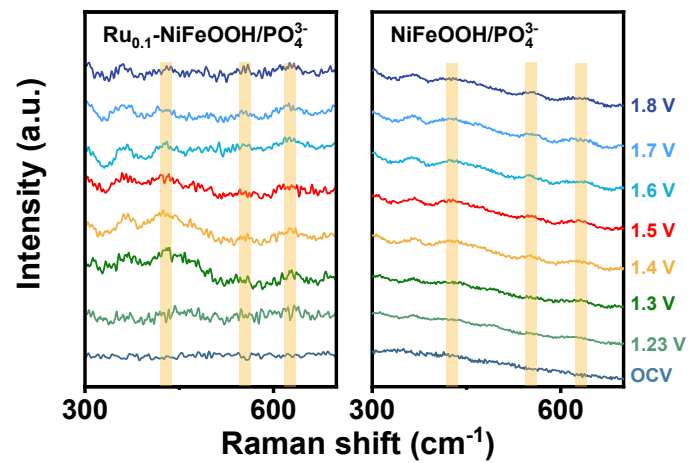

**Figure S22** In-situ Raman spectra of  $\text{Ru}_{0.1}\text{-NiFeOOH/PO}_4^{3-}$  and  $\text{NiFeOOH/PO}_4^{3-}$ .

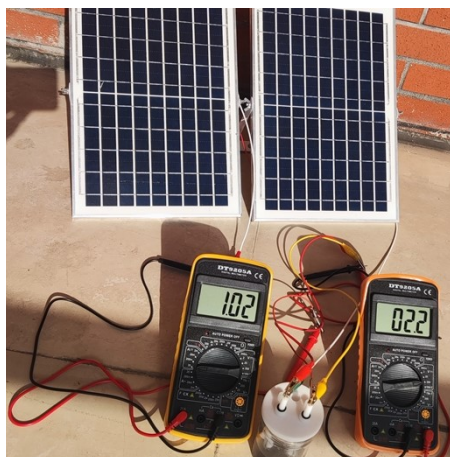

**Figure S23** A picture displaying a commercial silicon solar cell-powered  $\text{Ru}_{0.1}\text{-NiFeOOH/PO}_4^{3-}||\text{Ru}_{0.1}\text{-NiFeOOH/PO}_4^{3-}$  seawater electrolysis with  $1\text{ cm}^2$  electrodes operating at  $1,020\text{ mA cm}^{-2}$  under  $2.2\text{ V}$  ( $25\text{ }^\circ\text{C}$ ).

**Table S1** The Ni, Fe, and Ru atomic occupancies in Ru<sub>0.1</sub>-NiFeOOH/PO<sub>4</sub><sup>3-</sup>.

| Catalyst                                                 | Ni content<br>(at %) | Fe content<br>(at %) | Ru content<br>(at %) |
|----------------------------------------------------------|----------------------|----------------------|----------------------|
| Ru <sub>0.1</sub> -NiFeOOH/PO <sub>4</sub> <sup>3-</sup> | 33.85                | 18.18                | 0.91                 |

**Table S2** The overpotentials of Ru<sub>0.1</sub>-NiFeOOH/PO<sub>4</sub><sup>3-</sup> at 10, 100, and 300 mA cm<sup>-2</sup> in different electrolytes at 25 °C.

| Current density<br>(mA cm <sup>-2</sup> ) | 1 M KOH<br>(mV) | 1 M KOH + 0.5 M NaCl<br>(mV) | 1 M KOH + Seawater<br>(mV) |
|-------------------------------------------|-----------------|------------------------------|----------------------------|
| 10                                        | 245             | 246                          | 255                        |
| 100                                       | 291             | 289                          | 325                        |
| 300                                       | 318             | 313                          | 359                        |

**Table S3** Fitting EIS data of Ru<sub>0.1</sub>-NiFeOOH/PO<sub>4</sub><sup>3-</sup>, NiFeOOH/PO<sub>4</sub><sup>3-</sup>, Ru<sub>0.1</sub>-NiFeOOH, and RuO<sub>2</sub> at 25 °C.

| Catalyst                                                 | R <sub>s</sub><br>(Ω) | R <sub>ct</sub><br>(Ω) |
|----------------------------------------------------------|-----------------------|------------------------|
| Ru <sub>0.1</sub> -NiFeOOH/PO <sub>4</sub> <sup>3-</sup> | 1.54                  | 14.73                  |
| NiFeOOH/PO <sub>4</sub> <sup>3-</sup>                    | 1.34                  | 39.37                  |
| Ru <sub>0.1</sub> -NiFeOOH                               | 1.22                  | 83.21                  |
| RuO <sub>2</sub>                                         | 1.40                  | 72.25                  |

**Table S4** Overpotential comparison of seawater separation and similar seawater conditions for seawater separation of reported catalysts and Ru<sub>0.1</sub>-NiFeOOH/PO<sub>4</sub><sup>3-</sup> in this work at different given current densities (containing 10, 100, and 300 mA cm<sup>-2</sup>).

| Catalyst                                                     | Current density<br>(mA cm <sup>-2</sup> ) | Overpotential<br>(mV) | Ref.      |
|--------------------------------------------------------------|-------------------------------------------|-----------------------|-----------|
| Ru <sub>0.1</sub> -<br>NiFeOOH/PO <sub>4</sub> <sup>3-</sup> | 10                                        | 255                   | This work |
|                                                              | 100                                       | 325                   |           |
|                                                              | 300                                       | 359                   |           |
| Co <sub>3-x</sub> Pd <sub>x</sub> O <sub>4</sub>             | 10                                        | 370                   | 2         |
| Fe <sub>0.05</sub> CoNi LDH/NF                               | 10                                        | 287                   | 3         |
| ER-P/RP-SNCF-5                                               | 10                                        | 346                   | 4         |
| Cr-Co <sub>x</sub> P                                         | 100                                       | 325                   | 5         |
| NCFPO/C                                                      | 100                                       | 370                   | 6         |
| NiFeLDH                                                      | 300                                       | 370                   | 7         |
| NiFe/NiS <sub>x</sub> -Ni                                    | 400                                       | 300                   | 8         |

**Table S5** The performance of seawater electrolysis driven by commercial silicon-based solar panels compared to reported literature.

| Catalyst                                                            | Current (mA) | Voltage (V) | Ref.      |
|---------------------------------------------------------------------|--------------|-------------|-----------|
| Ru <sub>0.1</sub> -                                                 | 1040         | 1.6         | This work |
| NiFeOOH/PO <sub>4</sub> <sup>3-</sup>                               | 1020         | 2.2         | -         |
| Ir <sub>1</sub> /Ni <sub>1.6</sub> Mn <sub>1.4</sub> O <sub>4</sub> | 1040         | 2.85        | 9         |
| NiFe/NiS <sub>x</sub> -Ni                                           | 876          | 2.75        | 8         |
| Fe-Ni <sub>2</sub> P <sub>v</sub>                                   | 150          | 2.11        | 10        |
| Co <sub>x</sub> P <sub>v</sub> @NC                                  | 49.3         | 1.792       | 11        |



**Table S6** A comparison of the AEM seawater electrolyzer performance between Ru<sub>0.1</sub>-NiFeOOH/PO<sub>4</sub><sup>3-</sup> and three reported electrocatalysts.

| Catalyst                                           | Fe,P-NiSe <sub>2</sub>                                      | NiFe LDH                                                              | Cr <sub>2</sub> O <sub>3</sub> -CoO <sub>x</sub>    | Ru <sub>0.1</sub> -<br>NiFeOOH/PO <sub>4</sub> <sup>3-</sup> |
|----------------------------------------------------|-------------------------------------------------------------|-----------------------------------------------------------------------|-----------------------------------------------------|--------------------------------------------------------------|
| Cell efficiency at<br>500 mA cm <sup>-2</sup> (%)  | 73.8                                                        | 74.7                                                                  | 70.9                                                | 75.1                                                         |
| Current density at<br>1.8 V (mA cm <sup>-2</sup> ) | 800                                                         | 250                                                                   | 700                                                 | 1000                                                         |
| Highest current<br>density (mA cm <sup>-2</sup> )  | 1144                                                        | 1000                                                                  | 1000                                                | 2500                                                         |
| Faraday efficiency<br>(%)                          | 92                                                          | 94                                                                    | 92                                                  | 100                                                          |
| Durability<br>(h)                                  | 200                                                         | 2                                                                     | 100                                                 | 100                                                          |
| Ref.                                               | <i>Adv. Mater.</i><br><b>2021</b> , <i>33</i> ,<br>2101425. | <i>Energy<br/>Environ. Sci.</i><br><b>2020</b> , <i>13</i> ,<br>1725. | <i>Nat. Energy</i><br><b>2023</b> , <i>8</i> , 264. | This work                                                    |

### Electrolyzer efficiency

$$\begin{aligned} & \text{H}_2 \text{ production rate @ } 0.5 \text{ A cm}^{-2} \\ &= (j \text{ A cm}^{-2})(1 \text{ e}^-/1.602 \times 10^{-19} \text{ C})(1 \text{ H}_2/2 \text{ e}^-) \\ &= 0.5 \text{ A cm}^{-2} / (1.602 \times 10^{-19} \text{ C} \times 2) \\ &= 2.59 \times 10^{-6} \text{ mol H}_2 \text{ cm}^{-2} \text{ s}^{-1} \end{aligned}$$

LHV of H<sub>2</sub>

$$= 120 \text{ kJ g}^{-1} \text{ H}_2 = 2.42 \times 10^5 \text{ J mol}^{-1} \text{ H}_2$$

H<sub>2</sub> power out

$$\begin{aligned} &= (2.59 \times 10^{-6} \text{ mol cm}^{-2} \text{ s}^{-1}) \times (2.42 \times 10^5 \text{ J mol}^{-1}) \\ &= 0.627 \text{ W cm}^{-2} \end{aligned}$$

Electrolyzer Power of Ru<sub>0.1</sub>-NiFeOOH/PO<sub>4</sub><sup>3-</sup>||Pt/C

$$\begin{aligned} & \text{Electrolyzer Power (Ru}_{0.1}\text{-NiFeOOH/PO}_4^{3-}\text{) @ } 0.5 \text{ A cm}^{-2} \\ &= (0.5 \text{ A cm}^{-2}) (1.67 \text{ V}) \\ &= 0.835 \text{ W cm}^{-2} \end{aligned}$$

Efficiency of Ru<sub>0.1</sub>-NiFeOOH/PO<sub>4</sub><sup>3-</sup>||Pt/C

$$\begin{aligned} &= (\text{H}_2 \text{ Power Out}) / (\text{Electrolyzer Power}) \\ &= 0.627 \text{ W cm}^{-2} / 0.835 \text{ W cm}^{-2} \\ &= \end{aligned}$$

75.1%

## References

1. X. Kang, F. Yang, Z. Zhang, H. Liu, S. Ge, S. Hu, S. Li, Y. Luo, Q. Yu, Z. Liu, Q. Wang, W. Ren, C. Sun, H.-M. Cheng, B. Liu, *Nat. Commun.* 2023, **14**, 3607.
2. N. Wang, P. Ou, S. F. Hung, J. E. Huang, A. Ozden, J. Abed, I. Grigioni, C. Chen, R. K. Miao, Y. Yan, J. Zhang, Z. Wang, R. Dorakhan, A. Badreldin, A. Abdel-Wahab, D. Sinton, Y. Liu, H. Liang, E. H. Sargent, *Adv. Mater.* 2023, **35**, 2210057.
3. A. Gupta, H. K. Sadhanala, A. Gedanken, *Electrochim. Acta* 2023, **470**, 143269.
4. F. Liu, R. Hu, H. Qiu, H. Miao, Q. Wang, J. Yuan, *J. Alloys Compd.* 2022, **913**, 165342.
5. Y. Song, M. Sun, S. Zhang, X. Zhang, P. Yi, J. Liu, B. Huang, M. Huang, L. Zhang, *Adv. Funct. Mater.* 2023, **33**, 2214081.
6. H. J. Song, H. Yoon, B. Ju, D. Y. Lee, D. W. Kim, *ACS Catal.* 2019, **10**, 702.
7. S. Dresp, F. Dionigi, S. Loos, J. Ferreira de Araujo, C. Spöri, M. Glicch, H. Dau, P. Strasser, *Adv. Energy Mater.* 2018, **8**, 1800338.
8. Y. Kuang, M. J. Kenney, Y. Meng, W. H. Hung, Y. Liu, J. E. Huang, R. Prasanna, P. Li, Y. Li, L. Wang, M, C. Lin, M. D. McGehee, X. Sun, H. Dai, *Proc. Natl. Acad. Sci.* 2019, **116**, 6624.
9. N. Wen, Y. Xia, H. Wang, D. Zhang, H. Wang, X. Wang, X. Jiao, D. Chen, *Adv. Sci.* 2022, **9**, 2200529.
10. X. Liu, Q. Yu, X. Qu, X. Wang, J. Chi, L. Wang, *Adv. Mater.* 2023, **36**, 2307395.
11. X. Wang, X. Liu, S. Wu, K. Liu, X. Meng, B. Li, J. Lai, L. Wang, S. Feng, *Nano Energy* 2023, **109**, 108292.
